# Supplementary material for: Colorimetric indicators for volatile amines based on succinic anhydride (SAh)-grafted poly (lactic acid) (PLA)
Source: Royal Society of Chemistry journal article supplement (doi:10.1039/d0ay00550a), 2020-01-01
Supplement: d0ay00550a1.pdf [file d0ay00550a1.pdf]

## Colorimetric Indicators for Volatile Amines Based on Succinic Anhydride (SAh)-grafted Poly (lactic acid) (PLA) – Supplementary Information

Adrian Lopera-Valle, Anastasia Elias\*

*Department of Chemical and Materials Engineering, University of Alberta, Donadeo Innovation Centre for Engineering, Edmonton, Alberta, T6G 1H9, Canada*

*\*Corresponding Author - Phone: +1-780- 248-1589*

*E-mail: aelias@ualberta.ca*

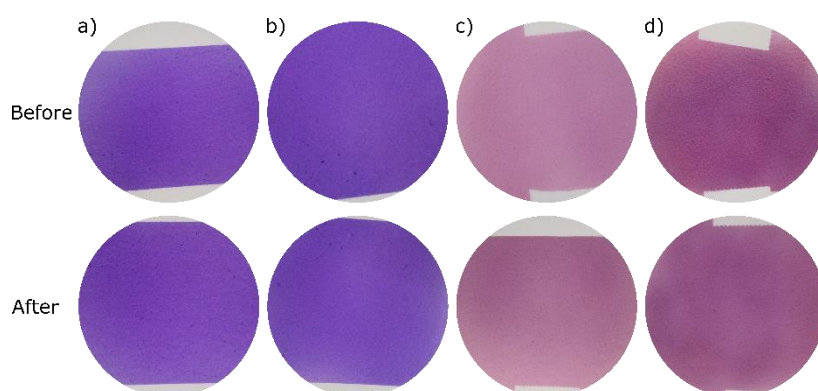

**Figure S1:** Blank samples of a) papers sprayed with only dye (no polymer was deposited) and exposed to methylamine vapor from a 400 ppm solution as control experiment; b) neat PLA exposed to water vapour; c) PLA-g-SA<sub>h</sub>30 indicators exposed to water vapour and d) to the vapours from a 300 ppm solution of methanol
